# Supplementary material
Source: MDPI journal article supplement (https://www.mdpi.com/2673-4591/6/1/7)
Supplement: s1 [file s1]

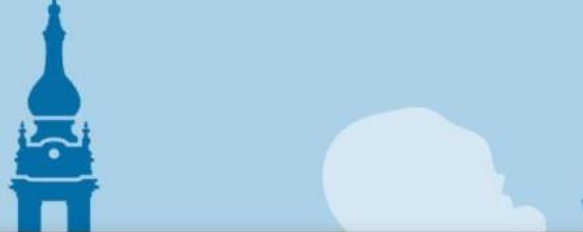

# Flexible SERS Sensors based on Carbon Nanomaterials-Supported Au Nanostructures

Rong Yang<sup>1</sup>, Weichen Fang,<sup>1</sup> Zuo Xiao,<sup>1</sup> Igor M. De Rosa<sup>2</sup>, Wenbo Xin<sup>1,2\*</sup>,

<sup>1</sup> College of Materials Science and Engineering, Nanjing Tech University

No. 30 Puzhu South Road, Jiangbei New Area, Nanjing, Jiangsu 211816, China

<sup>2</sup> Department of Materials Science and Engineering, University California, Los Angeles,

410 Westwood Plaza, Los Angeles, California 90095, USA

\*E-mail address: [xinwenbo@njtech.edu.cn](mailto:xinwenbo@njtech.edu.cn)

## Outline

Employing novel strategies of one-pot synthesis to grow anisotropic gold nanocrystals on carbon nanomaterials substrates (graphene and CNT), achieving sensitive SERS sensing.

This poster includes the following sections:

1. Structures of graphene supported Au nanocrystals
2. Structures of CNT supported Au nanocrystals
3. Application-flexible SERS sensors
4. Outlook of extended flexible and wearable sensors

## 1. Structures of Graphene Supported Au Nanocrystals

### ➤ Graphene/Au Nanoplates

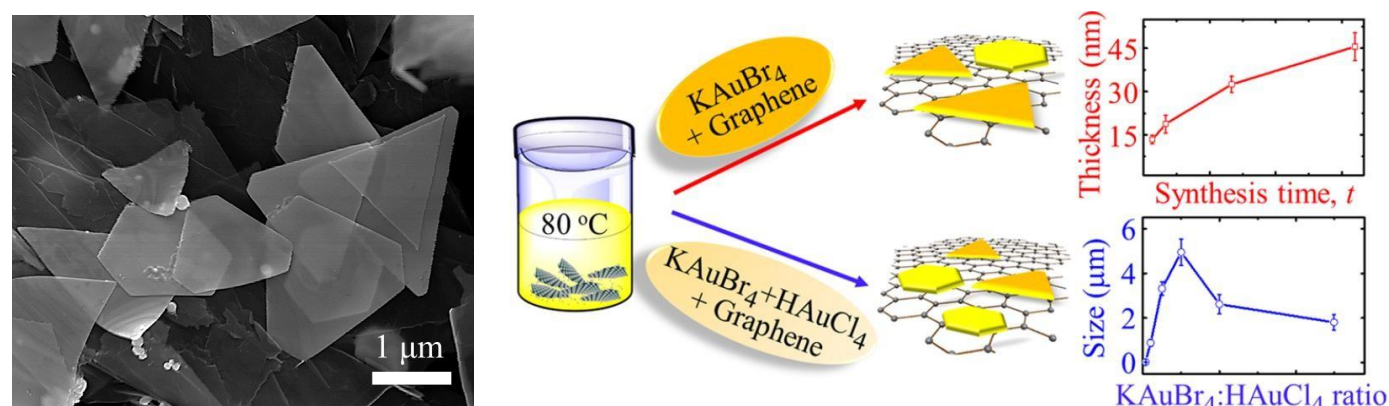

### ➤ Graphene/Au Nanobelts

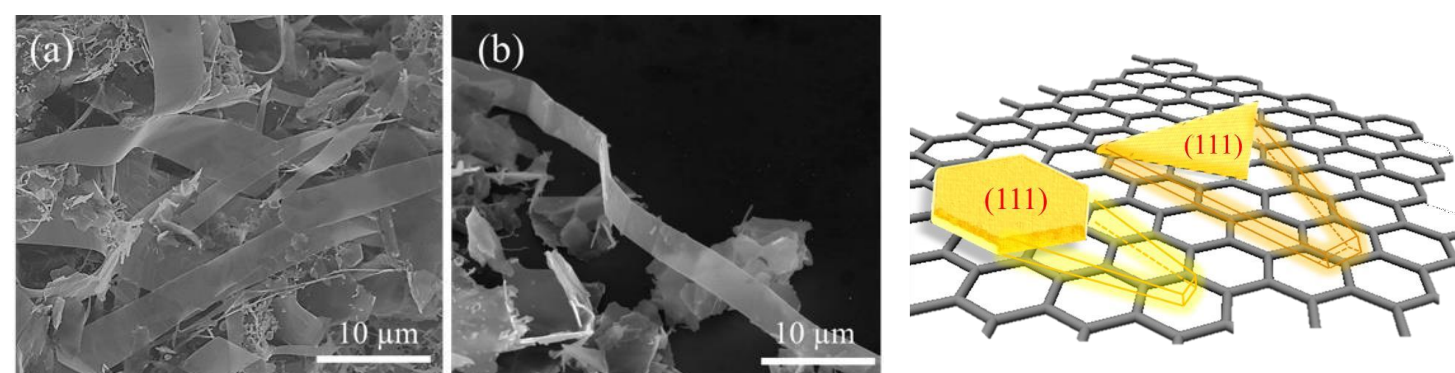

### ➤ Graphene/Au Nanowires

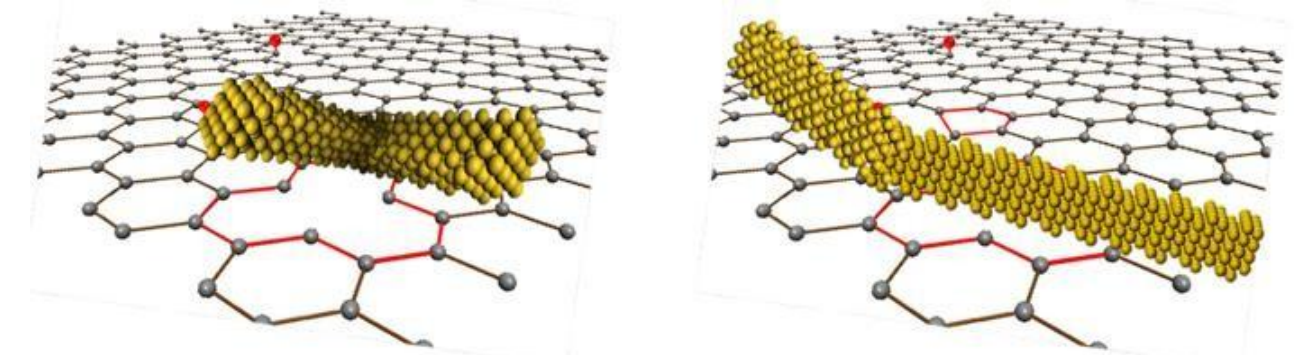

### ➤ Graphene/Au Nanoframes

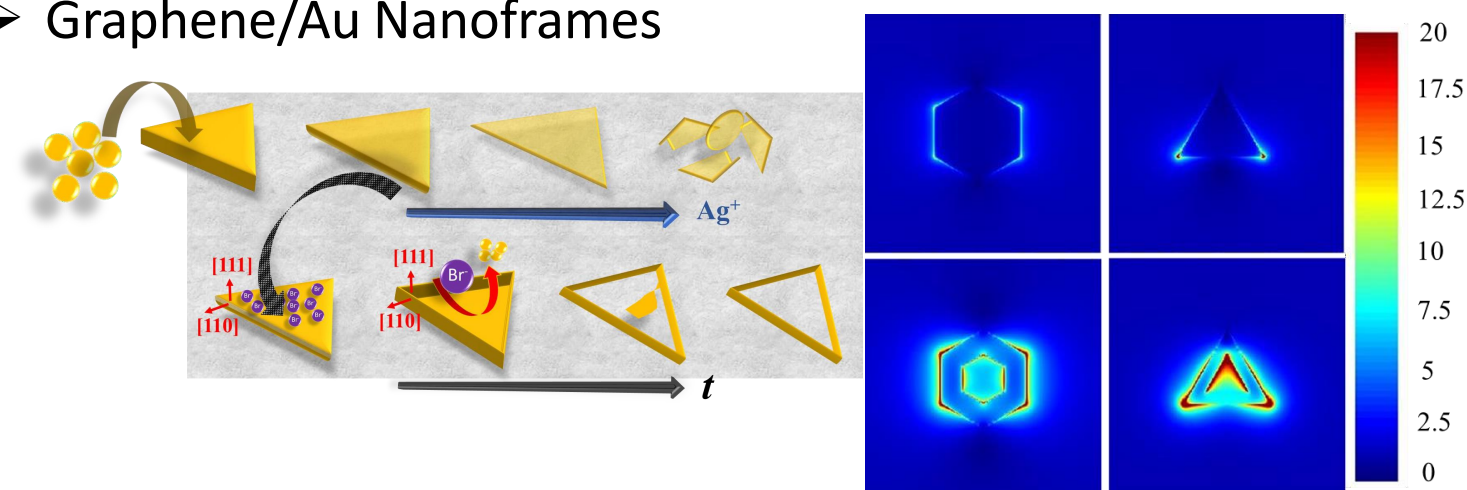

## 2. Structures of CNT Supported Au Nanocrystals

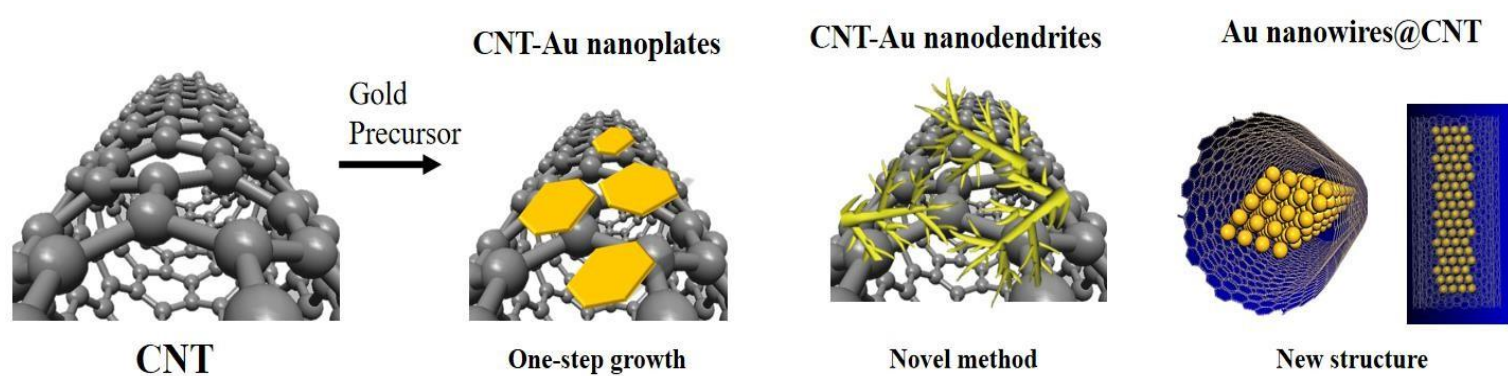

## 3. Application-Flexible SERS Sensors

Strategies:

- Improve the coverage density of Au nanocrystals
- Enhance the distribution uniformity of Au nanocrystals

### ➤ Graphene/Au Nanobelts

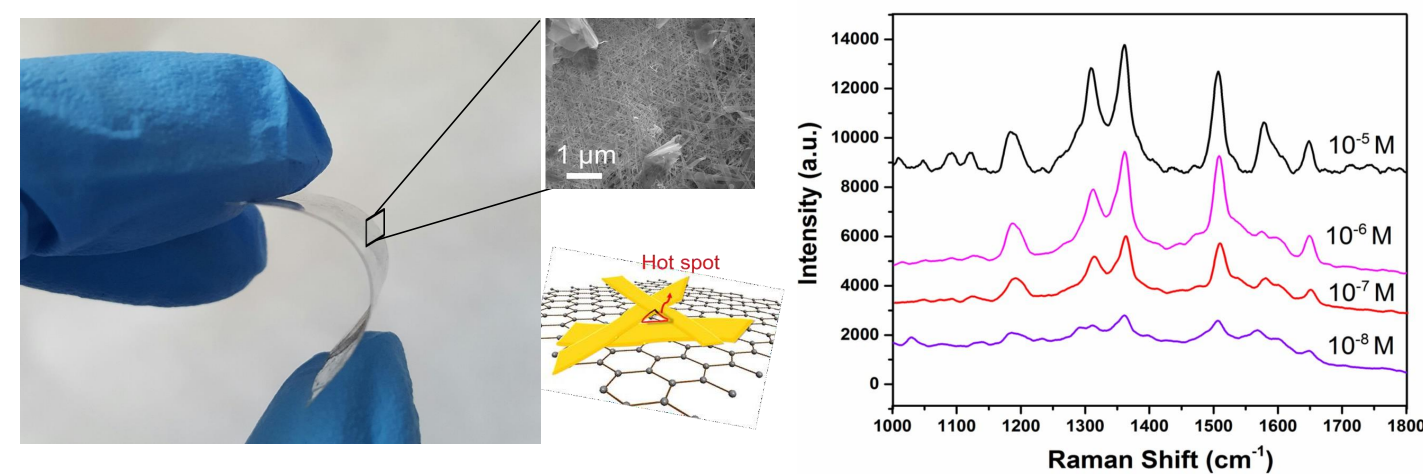

### ➤ CNT sheet/Au Nanoplates

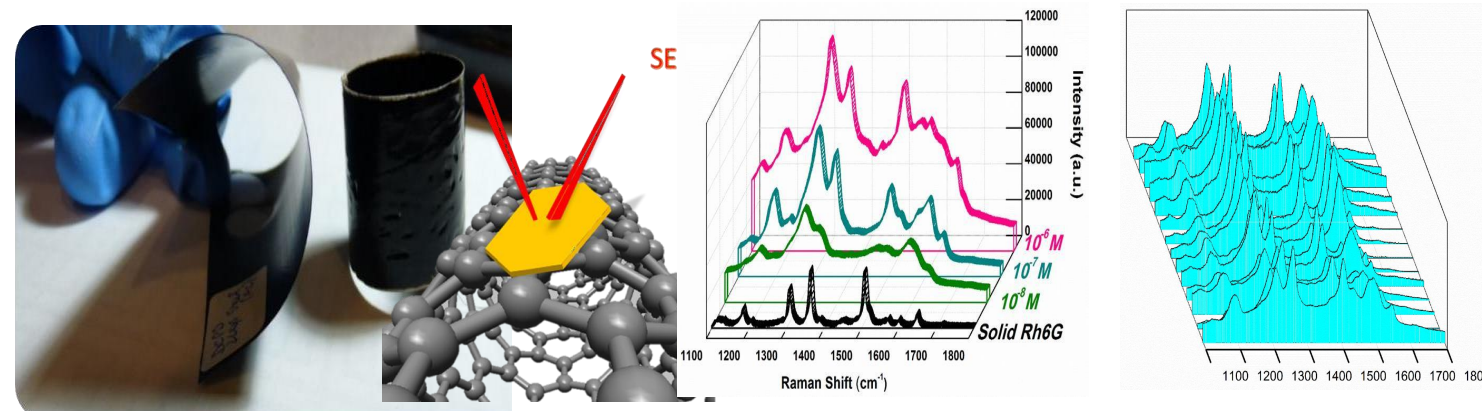

### ➤ Graphene/Au Nanoframes

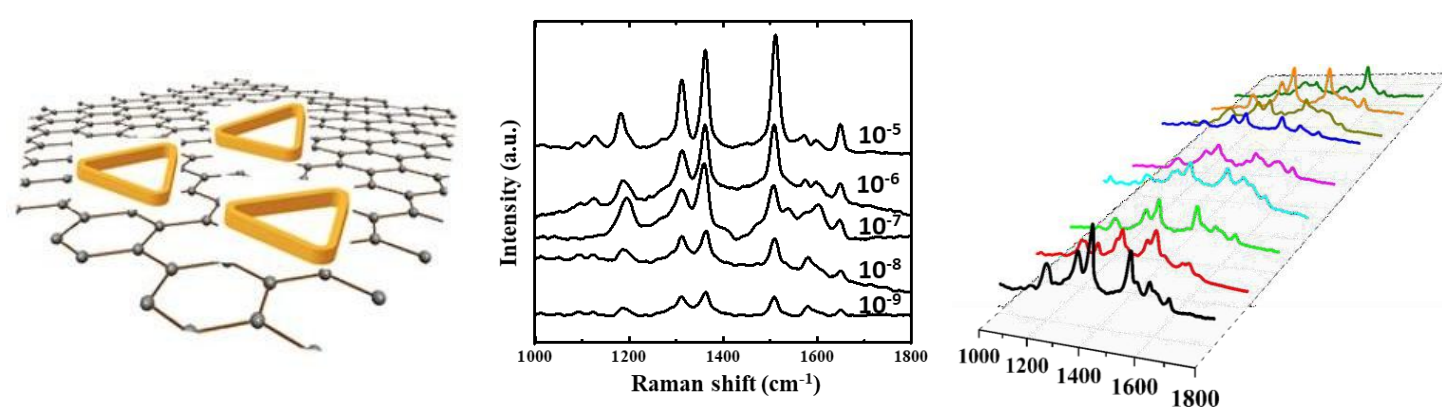

Status:

- Detected analytes at concentration levels down to 10<sup>-9</sup> M
- The value of RSD is 13.2% showing an excellent reproducibility
- Stable in harsh environment

## 4. Outlook

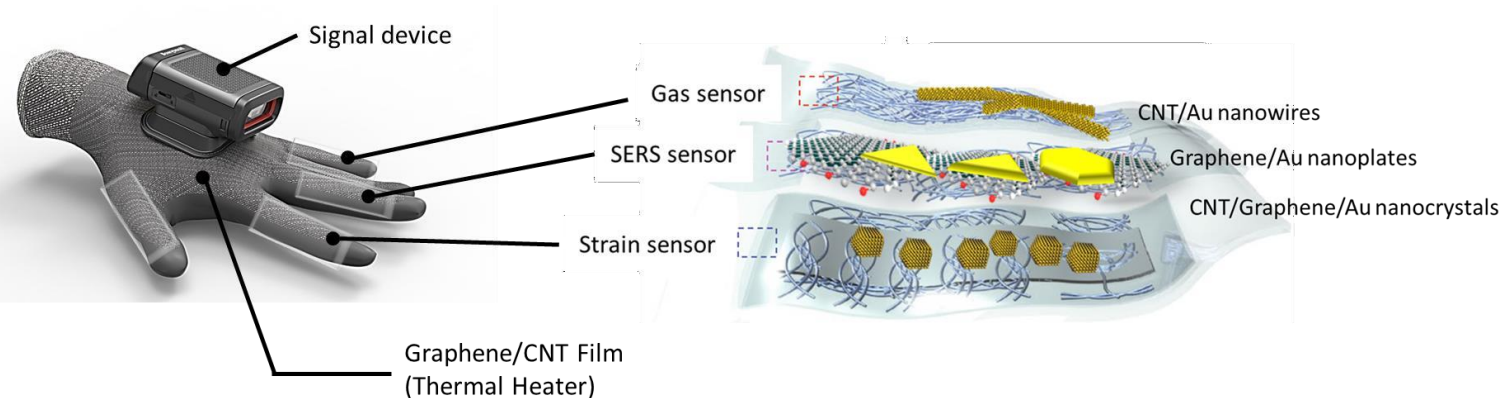

Based on the flexible substrates of graphene and carbon nanotubes and different structures of gold nanocrystals, it's expected to be applied to different types of wearable flexible sensors, such as gas sensors, strain sensors and SERS sensors, etc.
